# Supplementary material for: A novel synthesis towards a vanadium pentoxide porous nanodisk film as a cathode material for advanced Li-ion hybrid capacitors
Source: Royal Society of Chemistry journal article supplement (doi:10.1039/c9cc06958e), 2019-11-25
Supplement: c9cc06958e1.pdf [file c9cc06958e1.pdf]

## Electronic Supplementary Information

### **A novel synthesis towards vanadium pentoxide porous nanodisk film as a cathode material for advanced Li-ion hybrid capacitor†**

Xiaolin Liu,<sup>a</sup> Yuqi Jiang,<sup>a</sup> Deliang Ba,<sup>b</sup> Wan Zhou,<sup>a</sup> Yuanyuan Li\*,<sup>b</sup> Jinping Liu\*<sup>a, c</sup>

<sup>a</sup> School of Chemistry, Chemical Engineering and Life Science, and State Key Laboratory of Advanced Technology for Materials Synthesis and Processing, Wuhan University of Technology, Wuhan, 430070, Hubei, China. E-mail: liujp@whut.edu.cn

<sup>b</sup> School of Optical and Electronic Information, Huazhong University of Science and Technology, Wuhan, 430074, Hubei, China. E-mail: liyynano@hust.edu.cn

<sup>c</sup> State Center for International Cooperation on Designer Low-carbon & Environmental Materials, School of Materials Science and Engineering, Zhengzhou University, Zhengzhou 450001, Henan, China.

## Experimental section

### Materials synthesis

*Synthesis of VO<sub>2</sub> nanosheet array and V<sub>2</sub>O<sub>5</sub> nanodisk thin-film cathode:* All the chemicals were commercially supplied by the Sinopharm Chemical Reagent Co. Ltd., China and used without further purification. V<sub>2</sub>O<sub>5</sub> nanodisk film was synthesized via a hydrothermal and template oxidation method. Typically, commercial V<sub>2</sub>O<sub>5</sub> powder (0.1911 g) and oxalic acid (H<sub>2</sub>C<sub>2</sub>O<sub>4</sub>·2H<sub>2</sub>O; reducing agent) with a molar ratio of 1:3.4 were firstly added into a 35 mL mixed solution of acetone and H<sub>2</sub>O (the volume ratio is 2:5), and then sealed with vigorous stirring at 40 °C for 18 h until a clear blue solution was obtained. Subsequently, the resulting solution was transferred into a Teflon-lined stainless steel autoclave with a piece of 40 mm-thickness steel mesh inside and kept at 180 °C for 24 h. After cooling to room temperature, washed with deionized water and ethanol, the steel mesh covered uniformly with VO<sub>2</sub> nanosheet array was attained. Finally, the V<sub>2</sub>O<sub>5</sub> nanodisk film cathode was obtained by annealing VO<sub>2</sub> in air at 550 °C for 2 h with a heating rate of 2 °C min<sup>-1</sup>.

*Preparation of the activated carbon anode:* The activated carbon (KYP-50, Kuraray), acetylene black, and polyvinylidene fluoride (PVDF) with a weight ratio of 7:2:1 were added in N-methylpyrrolidinone (NMP) solution to obtain a slurry. The resultant slurry was pasted on copper foil, and dried in a vacuum oven at 120 °C overnight.

### Materials characterizations

Morphology and crystalline structure of the thin-film electrodes were characterized by scanning electron microscopy (SEM, JSM-6700F, 10 kV), transmission electron microscopy (TEM, JEM-2010FEF, 200 kV) and X-ray diffraction (XRD, Bruker D-8 Avance). The surface chemical composition of the V<sub>2</sub>O<sub>5</sub> nanodisk film was analyzed by X-ray photoelectron spectroscopy (XPS, Thermo Electron, VG ESCALAB 250 spectrometer). The Raman spectra were recorded on a Witech CRM200 system with the excitation laser of 532 nm. Thermogravimetric analysis was done under a N<sub>2</sub> flow with a temperature ramp of 10 °C min<sup>-1</sup>. Nitrogen sorption isotherms were measured

at 77 K on BELSORP-max analyzer after pretreated under vacuum at 200°C for 6 h.

### **Electrochemical measurements**

Electrochemical performance of the V<sub>2</sub>O<sub>5</sub> nanodisk film and activated carbon was examined in coin half cells with Li metal as the counter electrode. The solution of LiPF<sub>6</sub> (1 M) dissolved in ethylene carbonate (EC) and dimethyl carbonate (DMC) (volume ratio of 1:1) was used as the electrolyte (Guotai Huarong New Chemical Materials Co., Ltd, China). For the testing of full-cell LIHC, the V<sub>2</sub>O<sub>5</sub> nanodisk film and the pre-lithiated activated carbon were used as the cathode and anode, respectively. To demonstrate the flexibility of the device, the full cell was encapsulated by using a thin aluminum plastic film. Both the half and full cells were assembled in an argon-filled glove box. Galvanostatic charge/discharge measurements were performed by a multichannel battery testing system (Land-CT2001A, Wuhan Jinnuo, China). Cyclic voltammetry (CV) was carried out on an electrochemical workstation (CHI-660, CH Instruments Ins.).

The gravimetric or volumetric energy/power densities ( $E$  and  $P$ ) of the full-cell LIHC device were estimated according to equations  $E = \int_{t_1}^{t_2} IV(t) dt$  and  $P = E / \Delta t$ , where  $I$  is the constant current density (A g<sup>-1</sup> or A cm<sup>-3</sup>),  $V(t)$  is the working voltage at  $t$ ,  $dt$  is time differential,  $t_1$  and  $t_2$  are the start and end of discharging time (s), and  $\Delta t$  is the total discharging time. The mass was based on all the active materials while the volume was based on all components including cathode, anode and separator.

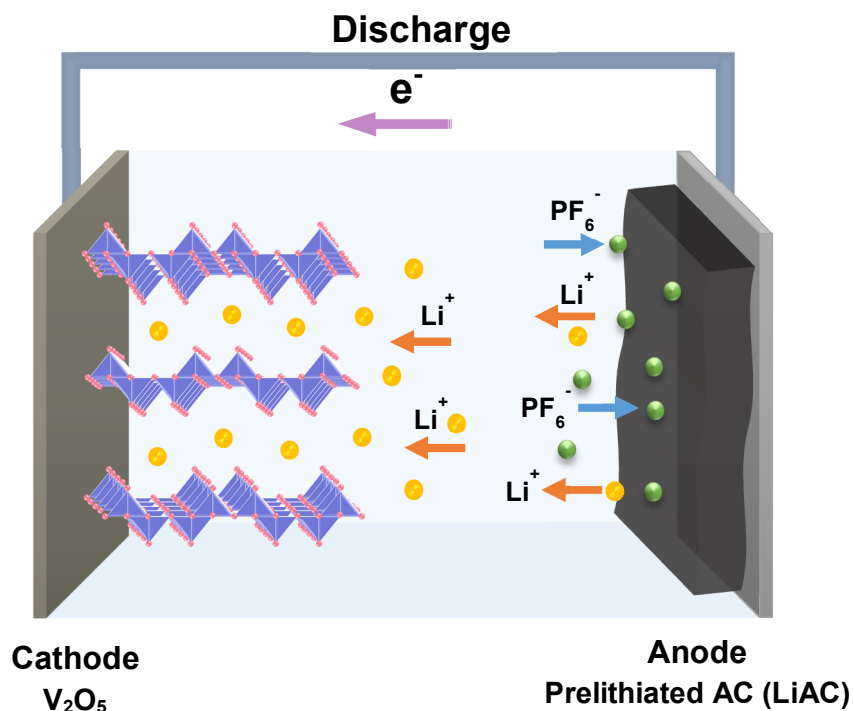

**Fig. S1** The device configuration of our LIHC. The device consists of a  $V_2O_5$  battery-type cathode and a prelithiated AC capacitive anode. During discharging process,  $Li^+$  cations are removed from the anode and inserted into  $V_2O_5$  cathode; at the same time,  $PF_6^-$  anions are adsorbed on the surface of anode to form electric double layer. When charged,  $Li^+$  are deinserted from cathode and return back into anode while  $PF_6^-$  anions are desorbed from the anode. The electrons flow across the external circuit accordingly.

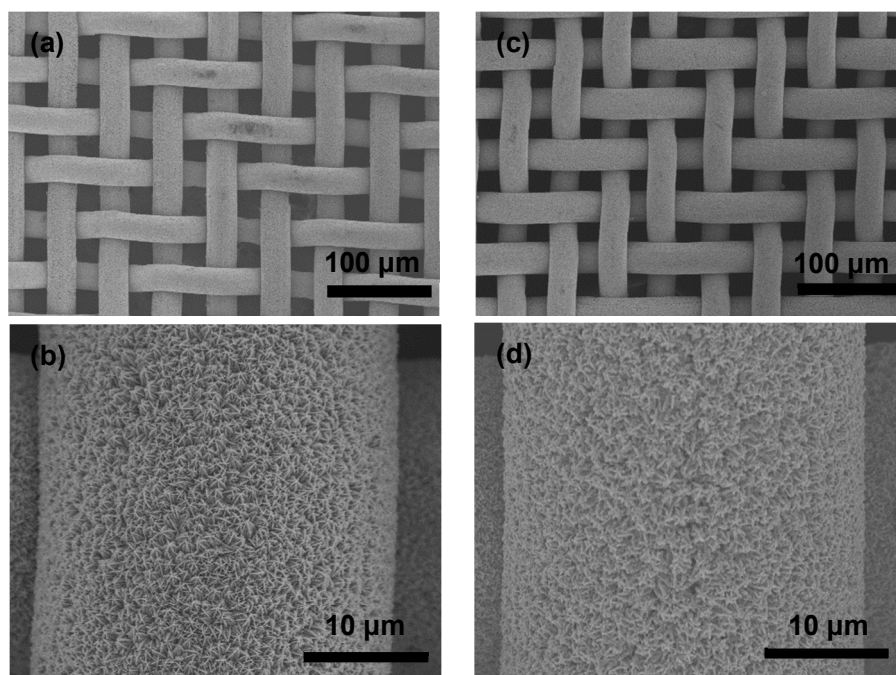

**Fig. S2** SEM images of (a,b) the precursor  $VO_2$  and (c,d)  $V_2O_5$ .

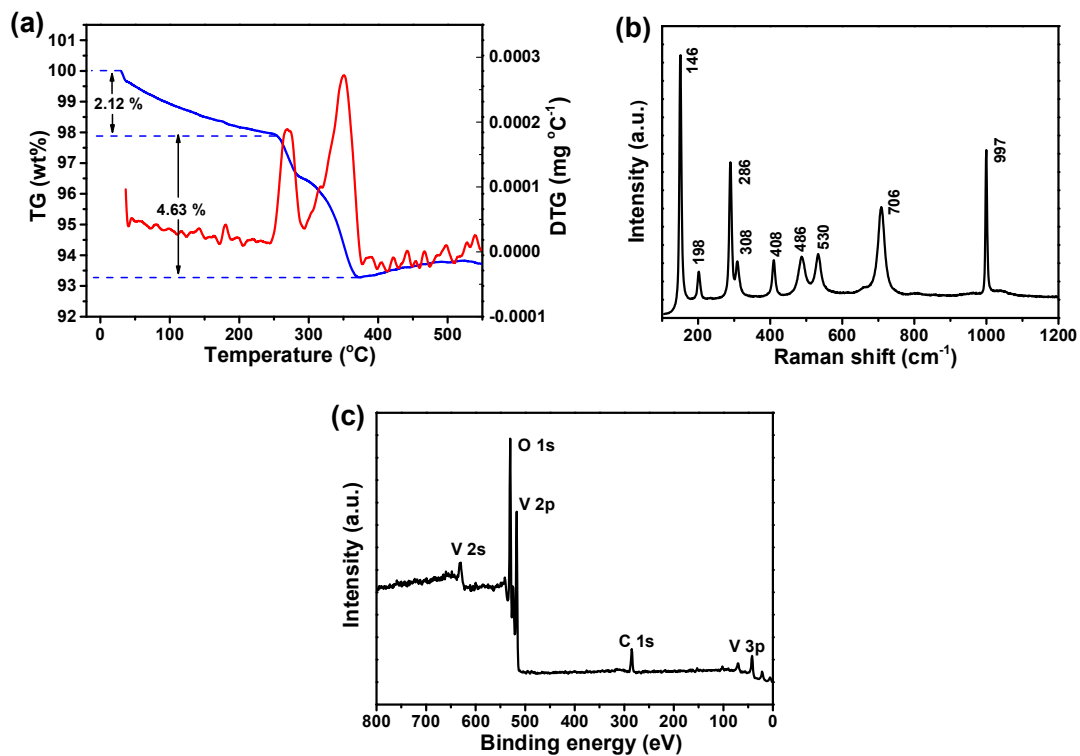

**Fig. S3** (a) TGA curves, (b) Raman result and (c) XPS spectrum of the  $V_2O_5$  film electrode.

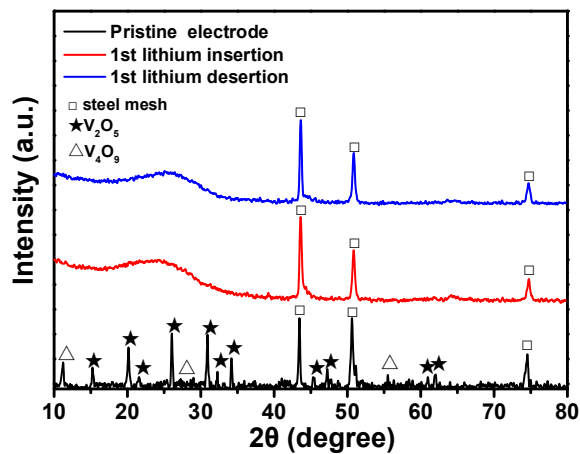

**Fig. S4** XRD results of  $V_2O_5$  cathode after the first lithiation/delithiation. It is evident that the crystallinity greatly decreases upon lithium insertion.

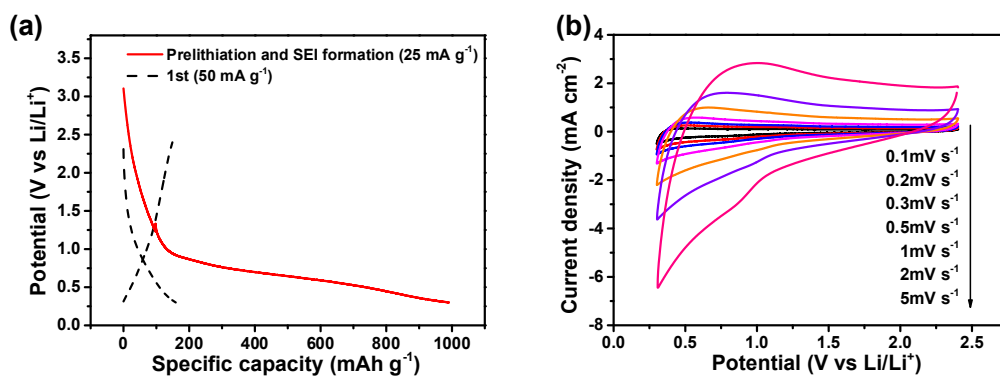

**Fig. S5** (a) Prelithiation/SEI formation and subsequent 1<sup>st</sup> charge/discharge profiles of the anode. (b) CV curves of LiAC anode at different scan rates.

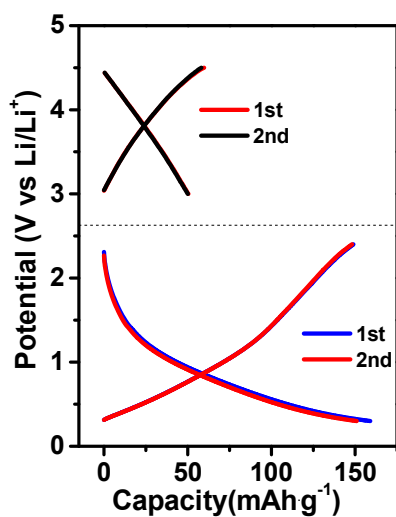

**Fig. S6** Comparison of charge/discharge curves of AC as cathode and LiAC as anode. LiAC anode stores charges not merely based on electric-double-layer capacitance (EDLC), it also based on capacitive Li insertion/desertion.

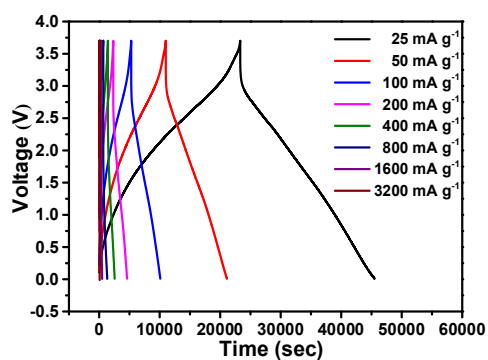

**Fig. S7** Typical charge/discharge profiles of the LIHC device at various current densities
